# Supplementary material for: Strategic Motives Drive Proposers to Offer Fairly in Ultimatum Games: An fMRI Study
Source: PubMed Central journal article supplement (PMC5428836; doi:10.1038/s41598-017-00608-8), 2017-04-03
Supplement: 41598_2017_608_MOESM1_ESM.pdf [file 41598_2017_608_MOESM1_ESM.pdf]

## Supplementary Information

### Results

#### Overall RTs with different share and stake sizes

The repeated-measures analysis of variance (ANOVA) detected a significant main effect of share size,  $F(1.994, 83.741) = 13.726, p < .001, \eta^2 = .246$ . Proposers decreased the RT of choosing a fair offer when the other choice was more selfish (mean times,  $1.539 \pm .058, 1.523 \pm .061, 1.453 \pm .056$  and  $1.416 \pm .050$  s when the other choice offered 40%, 30%, 20%, and 10% of the stakes, respectively). Post-hoc analyses indicated that all pairs of comparisons were significant, except when the other choice offered 40% vs. 30% of the stakes and when the other choice offered 20% vs. 10% of the stakes. The main effect of stake size was also significant,  $F(1, 42) = 12.596, p = .001, \eta^2 = .231$ . Proposers took longer for higher stakes, with mean values of  $1.443 \pm .055$  and  $1.523 \pm .057$  s for low and high stake sizes, respectively. No significant interaction was found,  $F(2.393, 100.519) = 2.738, p = .060, \eta^2 = .061$ .

Table S1. The number of choices of a fair and a selfish offer (choices taken were highlighted in bold) and error trials from all participants.

| participant #<br>conditions              | P16 | P17 | P19 | P20 | P21 | P22 | P23 | P24 | P25 | P26 | P27 | P28 | P29 | P30 | P31 | P32 | P33 | P35 | P36 | P37 | P38 | P39 | P40 | P41 | P42 | P43 | P44 | P45 | P46 | P47 | P48 | P49 | P50 | P51 | P52 | P53 | P54 | P55 | P56 | P57 | P58 | P59 | P60 |
|------------------------------------------|-----|-----|-----|-----|-----|-----|-----|-----|-----|-----|-----|-----|-----|-----|-----|-----|-----|-----|-----|-----|-----|-----|-----|-----|-----|-----|-----|-----|-----|-----|-----|-----|-----|-----|-----|-----|-----|-----|-----|-----|-----|-----|-----|
| 200<br><b>50%</b> vs. 40% or 30%         | 19  | 40  | 22  | 40  | 11  | 22  | 40  | 23  | 40  | 16  | 40  | 33  | 40  | 22  | 38  | 30  | 38  | 40  | 31  | 24  | 40  | 40  | 30  | 29  | 24  | 3   | 12  | 2   | 3   | 21  | 34  | 0   | 27  | 20  | 33  | 30  | 26  | 40  | 37  | 12  | 33  | 19  | 40  |
| 200<br><b>50%</b> vs. 20% or 10%         | 40  | 40  | 40  | 40  | 34  | 38  | 40  | 40  | 40  | 38  | 40  | 39  | 40  | 40  | 39  | 39  | 38  | 40  | 36  | 38  | 40  | 40  | 31  | 37  | 40  | 2   | 37  | 37  | 6   | 28  | 40  | 3   | 40  | 40  | 34  | 39  | 40  | 39  | 39  | 23  | 37  | 39  | 40  |
| 2000<br><b>50%</b> vs. 40% or 30%        | 13  | 40  | 35  | 39  | 18  | 18  | 40  | 1   | 40  | 28  | 40  | 40  | 23  | 37  | 39  | 22  | 18  | 40  | 10  | 27  | 40  | 40  | 37  | 34  | 26  | 39  | 8   | 0   | 35  | 22  | 16  | 35  | 29  | 21  | 25  | 27  | 25  | 40  | 39  | 12  | 31  | 0   | 40  |
| 2000<br><b>50%</b> vs. 20% or 10%        | 36  | 40  | 39  | 40  | 38  | 39  | 40  | 33  | 39  | 40  | 40  | 40  | 40  | 40  | 40  | 38  | 26  | 40  | 36  | 39  | 40  | 40  | 37  | 38  | 40  | 38  | 25  | 36  | 36  | 25  | 24  | 40  | 40  | 40  | 31  | 37  | 40  | 39  | 40  | 23  | 40  | 24  | 40  |
| 200<br>50% vs. <b>40%</b> or <b>30%</b>  | 21  | 0   | 18  | 0   | 29  | 18  | 0   | 17  | 0   | 24  | 0   | 2   | 0   | 18  | 1   | 10  | 2   | 0   | 9   | 16  | 0   | 0   | 10  | 11  | 15  | 37  | 27  | 38  | 37  | 21  | 6   | 40  | 13  | 20  | 6   | 10  | 14  | 0   | 3   | 27  | 7   | 21  | 0   |
| 200<br>50% vs. <b>20%</b> or <b>10%</b>  | 0   | 0   | 0   | 0   | 5   | 2   | 0   | 0   | 0   | 2   | 0   | 0   | 0   | 0   | 1   | 1   | 2   | 0   | 4   | 2   | 0   | 0   | 9   | 3   | 0   | 38  | 3   | 3   | 34  | 13  | 0   | 37  | 0   | 0   | 4   | 1   | 0   | 0   | 1   | 16  | 3   | 1   | 0   |
| 2000<br>50% vs. <b>40%</b> or <b>30%</b> | 27  | 0   | 5   | 1   | 21  | 22  | 0   | 39  | 0   | 12  | 0   | 0   | 17  | 3   | 1   | 18  | 22  | 0   | 30  | 13  | 0   | 0   | 3   | 6   | 14  | 1   | 32  | 40  | 5   | 16  | 24  | 5   | 10  | 19  | 14  | 13  | 14  | 0   | 1   | 28  | 9   | 40  | 0   |
| 2000<br>50% vs. <b>20%</b> or <b>10%</b> | 3   | 0   | 1   | 0   | 2   | 1   | 0   | 6   | 0   | 0   | 0   | 0   | 0   | 0   | 0   | 0   | 14  | 0   | 4   | 1   | 0   | 0   | 3   | 2   | 0   | 2   | 15  | 3   | 4   | 14  | 15  | 0   | 0   | 0   | 8   | 3   | 0   | 0   | 0   | 16  | 0   | 16  | 0   |
| Error                                    | 1   | 0   | 0   | 0   | 2   | 0   | 0   | 1   | 1   | 0   | 0   | 6   | 0   | 0   | 1   | 2   | 0   | 0   | 0   | 0   | 0   | 0   | 0   | 0   | 1   | 0   | 1   | 1   | 0   | 0   | 1   | 0   | 1   | 0   | 5   | 0   | 1   | 2   | 0   | 3   | 0   | 0   | 0   |
